# Supplementary material for: High-temperature (121 °C) treatment of soy protein isolate with water partially decomposes constituent amino acid residues, which reduces the nutritional value of protein as an amino acid source and alters social novelty recognition in mice
Source: Research Square preprint supplement (doi:10.21203/rs.3.rs-8148598/v1), 2025-12-03
Supplement: Supplementary file 1 [file 1f17c81fc2d66fd6a209f301.docx]

**Supplementary Figure S1. Amino acid composition of insoluble fraction after in vitro digestion of HT-treated SPI**

Insoluble material obtained after pepsin-pancreatin digestion of HT-treated SPI was hydrolyzed with HCl and analyzed for amino acid composition.
