# Supplementary material for: High-temperature (121 °C) treatment of soy protein isolate with water partially decomposes constituent amino acid residues, which reduces the nutritional value of protein as an amino acid source and alters social novelty recognition in mice
Source: Research Square preprint supplement (doi:10.21203/rs.3.rs-8148598/v1), 2025-12-03
Supplement: Supplementary file 2 [file 2ad771e7b13a092d2de55423.docx]

**Supplementary Table S1. Composition of experimental diets and feed efficiency in rats fed non-treated or HT-treated SPI.**

| Components (g) | Non-treated SPI group | HT-treated SPI group |
| --- | --- | --- |
| Casein | - | - |
| SPI | 13.5 | - |
| HT-treated SPI |  | 13.7 |
| Mineral mixture | 3.5 | 3.5 |
| Vitamin mixture | 1.0 | 1.0 |
| Corn oil | 5.0 | 5.0 |
| Cellulose | 4.0 | 4.0 |
| Alfa-corn starch | 48.7 | 48.5 |
| Sucrose | 24.3 | 24.3 |
| Total | 100 | 100 |

Diets were designed based on the nutrient balance of AIN-93G but modified to replace casein with either SPI or HT-treated SPI as the sole protein source.

**Supplementary Table S2. Body weight, food intake, and organ weights in rats after 2-week SPI or HT-treated SPI feeding.**

| Group | Non-treated SPI group | | | HT-treated SPI group | | |
| --- | --- | --- | --- | --- | --- | --- |
| Body weight (g) | 179.2 | ± | 3.75 | 170.3 | ± | 2.25 |
| Total body weight gain | 66.2 | ± | 2.43 | 55.5 | ± | 2.01* |
| Total food intake (g) | 260.3 | ± | 8.22 | 246.8 | ± | 5.56 |
| Food efficiency ratio *c* | 0.25 | ± | 0.00 | 0.23 | ± | 0.00* |
| Liver weight  (g/ body weight of 100 g) | 3.69 | ± | 0.03 | 3.65 | ± | 0.01 |
| Pancreas weight (g/ body weight of 100 g) | 0.24 | ± | 0.01 | 0.22 | ± | 0.00 |
| Cecum weight  (g/ body weight of 100 g) | 1.39 | ± | 0.02 | 1.47 | ± | 0.01 |
|  |  |  |  |  |  |  |

Values are presented as mean ± SEM (n = 6). *p < 0.05 compared with the SPI group. Food efficiency ratio = body weight gain / total food intake.

| **Supplementary Table S3. Blood biochemistry analysis of rats after 2-week SPI or HT-treated SPI feeding.** | | | | | | |
| --- | --- | --- | --- | --- | --- | --- |
| Group | Non-treated SPI group | | | HT-treated SPI group | | |
| AST (IU/L) | 79.6 | ± | 5.02 | 92.3 | ± | 1.31 |
| ALT (IU/L) | 50.2 | ± | 1.55 | 51.5 | ± | 1.51 |
| Glucose (mg/dL) | 145.6 | ± | 1.59 | 146.7 | ± | 2.0 4 |
| Protein (mg/dL) | 5.58 | ± | 0.03 | 5.33 | ± | 0.02* |
| Albumin (mg/dL) | 2.50 | ± | 0.02 | 2.42 | ± | 0.01 |
| Triglycerides (mg/dL) | 103.2 | ± | 4.33 | 80.5 | ± | 4.44 |
| Cholesterol (mg/dL) | 72.8 | ± | 0.98 | 73.0 | ± | 0.93 |
| Creatinine (mg/dL) | 0.20 | ± | 0.00 | 0.20 | ± | 0.00 |
| BUN (mg/dL) | 10.3 | ± | 0.08 | 11.5 | ± | 0.12* |
| Uric acid (mg/dL) | 1.24 | ± | 0.02 | 1.05 | ± | 0.02 |

Values are presented as mean ± SEM (n = 6). *p < 0.05 compared with the SPI group.

All measurements were outsourced to Oriental Yeast Co., Ltd. (Osaka, Japan),
